# Supplementary material for: Gut Microbiota Composition in Mid-Pregnancy Is Associated with Gestational Weight Gain but Not Prepregnancy Body Mass Index
Source: PubMed Central journal article supplement — J Womens Health (Larchmt). 2018 Oct 12;27(10):1293–301. doi: 10.1089/jwh.2017.6488 (PMC6205042; doi:10.1089/jwh.2017.6488), 2018-10-12
Supplement: Supp_Table1.pdf [file Supp_Table1.pdf]

## Supplementary Data

SUPPLEMENTARY TABLE S1. BACTERIAL  
ABUNDANCE DATA

| Phyla                                 | Mean relative abundance (%) |
|---------------------------------------|-----------------------------|
| Unassigned                            | 0.057561                    |
| <i>Actinobacteria</i>                 | 0.11257                     |
| <i>Bacteroidetes</i>                  | 45.89742                    |
| <i>Cyanobacteria</i>                  | 0.01667                     |
| <i>Firmicutes</i>                     | 53.31591                    |
| <i>Fusobacteria</i>                   | 0.006446                    |
| <i>Lentisphaerae</i>                  | 0.008652                    |
| <i>Proteobacteria</i>                 | 0.307848                    |
| <i>Tenericutes</i>                    | 0.27154                     |
| <i>Verrucomicrobia</i>                | 0.005378                    |
| <b>Class</b>                          |                             |
| Unassigned                            | 0.057561                    |
| <i>Coriobacteriia</i>                 | 0.11257                     |
| <i>Bacteroidia</i>                    | 45.89742                    |
| 4C0d.2 (phylum <i>Cyanobacteria</i> ) | 0.01667                     |
| <i>Bacilli</i>                        | 0.393939                    |
| <i>Clostridia</i>                     | 52.41632                    |
| <i>Erysipelotrichi</i>                | 0.505647                    |
| <i>Fusobacteriia</i>                  | 0.006446                    |
| <i>Lentisphaeria</i>                  | 0.008652                    |
| <i>Alphaproteobacteria</i>            | 0.018665                    |
| <i>Betaproteobacteria</i>             | 0.15313                     |
| <i>Gammaproteobacteria</i>            | 0.136052                    |
| <i>Mollicutes</i>                     | 0.22359                     |
| <i>RF3</i>                            | 0.04795                     |
| <i>Verrucomicrobiae</i>               | 0.005378                    |
| <b>Order</b>                          |                             |
| Unassigned                            | 0.057561                    |
| <i>Coriobacteriales</i>               | 0.11257                     |
| <i>Bacteroidales</i>                  | 45.89742                    |
| <i>YS2</i>                            | 0.01667                     |
| <i>Lactobacillales</i>                | 0.383032                    |
| <i>Turicibacterales</i>               | 0.010907                    |
| <i>Clostridiales</i>                  | 52.40388                    |
| <i>SHA.98</i>                         | 0.012444                    |
| <i>Erysipelotrichales</i>             | 0.505647                    |
| <i>Fusobacteriales</i>                | 0.006446                    |
| <i>Victivallales</i>                  | 0.008652                    |
| <i>RF32</i>                           | 0.018665                    |
| <i>Burkholderiales</i>                | 0.15313                     |
| <i>Enterobacteriales</i>              | 0.104165                    |
| <i>Pasteurellales</i>                 | 0.031887                    |
| <i>RF39</i>                           | 0.22359                     |
| <i>ML615J.28</i>                      | 0.04795                     |
| <i>Verrucomicrobiales</i>             | 0.005378                    |
| <b>Family</b>                         |                             |
| Unassigned                            | 0.057561                    |
| <i>Coriobacteriaceae</i>              | 0.11257                     |
| <i>Bacteroidaceae</i>                 | 32.41117                    |
| <i>Porphyromonadaceae</i>             | 2.924716                    |
| <i>Prevotellaceae</i>                 | 2.443383                    |
| <i>Rikenellaceae</i>                  | 3.726357                    |
| <i>S24.7</i>                          | 1.373809                    |
| <i>Barnesiellaceae</i>                | 1.435299                    |

(continued)

SUPPLEMENTARY TABLE S1. (CONTINUED)

| Phyla                                       | Mean relative abundance (%) |
|---------------------------------------------|-----------------------------|
| <i>Odoribacteraceae</i>                     | 0.5163                      |
| <i>Paraprevotellaceae</i>                   | 1.066396                    |
| Unknown family of <i>YS2</i>                | 0.01667                     |
| <i>Lactobacillaceae</i>                     | 0.02137                     |
| <i>Streptococcaceae</i>                     | 0.361662                    |
| <i>Turicibacteraceae</i>                    | 0.010907                    |
| Unknown family of <i>Clostridiales</i>      | 0.361798                    |
| Unknown family of <i>Clostridiales</i>      | 9.383414                    |
| <i>Christensenellaceae</i>                  | 1.131544                    |
| <i>Clostridiaceae</i>                       | 0.962914                    |
| <i>Dehalobacteriaceae</i>                   | 0.006687                    |
| <i>Lachnospiraceae</i>                      | 6.261562                    |
| <i>Peptococcaceae</i>                       | 0.016657                    |
| <i>Peptostreptococcaceae</i>                | 0.054562                    |
| <i>Ruminococcaceae</i>                      | 32.55501                    |
| <i>Veillonellaceae</i>                      | 1.636918                    |
| <i>Mogibacteriaceae</i>                     | 0.03281                     |
| Unknown family of <i>SHA.98</i>             | 0.012444                    |
| <i>Erysipelotrichaceae</i>                  | 0.505647                    |
| <i>Fusobacteriaceae</i>                     | 0.006446                    |
| <i>Victivallaceae</i>                       | 0.008652                    |
| Unknown family of <i>RF32</i>               | 0.018665                    |
| <i>Alcaligenaceae</i>                       | 0.15313                     |
| <i>Enterobacteriaceae</i>                   | 0.104165                    |
| <i>Pasteurellaceae</i>                      | 0.031887                    |
| Unknown family of <i>RF39</i>               | 0.22359                     |
| Unknown family of <i>ML615J.28</i>          | 0.04795                     |
| <i>Verrucomicrobiaceae</i>                  | 0.005378                    |
| <b>Genus</b>                                |                             |
| Unassigned                                  | 0.057561                    |
| Unknown genus of <i>Coriobacteriaceae</i>   | 0.054859                    |
| <i>Collinsella</i>                          | 0.057711                    |
| <i>Bacteroides</i>                          | 32.41117                    |
| <i>Parabacteroides</i>                      | 2.924716                    |
| <i>Prevotella</i>                           | 2.443383                    |
| Unknown genus of <i>Rikenellaceae</i>       | 0.017862                    |
| Unknown genus of <i>Rikenellaceae</i>       | 3.708494                    |
| Unknown genus of <i>S247</i>                | 1.373809                    |
| Unknown genus of <i>Barnesiellaceae</i>     | 1.435299                    |
| <i>Butyricimonas</i>                        | 0.101478                    |
| <i>Odoribacter</i>                          | 0.414822                    |
| Unknown genus of <i>Paraprevotellaceae</i>  | 0.012541                    |
| <i>Paraprevotella</i>                       | 0.838143                    |
| <i>Prevotella</i>                           | 0.215713                    |
| Unknown genus of <i>YS2</i>                 | 0.01667                     |
| <i>Lactobacillus</i>                        | 0.02137                     |
| <i>Lactococcus</i>                          | 0.025231                    |
| <i>Streptococcus</i>                        | 0.336431                    |
| <i>Turicibacter</i>                         | 0.010907                    |
| Unknown genus of <i>Clostridiales</i>       | 0.361798                    |
| Unknown genus of <i>Clostridiales</i>       | 9.383414                    |
| Unknown genus of <i>Christensenellaceae</i> | 1.131544                    |
| Unknown genus of <i>Clostridiaceae</i>      | 0.289123                    |
| <i>Clostridium</i>                          | 0.673791                    |
| <i>Dehalobacterium</i>                      | 0.006687                    |
| Unknown genus of <i>Lachnospiraceae</i>     | 0.181512                    |

(continued)

SUPPLEMENTARY TABLE S1. (CONTINUED)

| <i>Phyla</i>                                  | <i>Mean relative abundance (%)</i> |
|-----------------------------------------------|------------------------------------|
| Unknown genus of <i>Lachnospiraceae</i>       | 3.124668                           |
| <i>Anaerostipes</i>                           | 0.073433                           |
| <i>Blautia</i>                                | 0.839249                           |
| <i>Coprococcus</i>                            | 0.984572                           |
| <i>Dorea</i>                                  | 0.293654                           |
| <i>Lachnobacterium</i>                        | 0.02796                            |
| <i>Lachnospira</i>                            | 0.465199                           |
| <i>Roseburia</i>                              | 0.037708                           |
| <i>Ruminococcus</i>                           | 0.233607                           |
| <i>rc4.4</i>                                  | 0.016657                           |
| Unknown genus of <i>Peptostreptococcaceae</i> | 0.054562                           |
| Unknown genus of <i>Ruminococcaceae</i>       | 0.023423                           |
| Unknown genus of <i>Ruminococcaceae</i>       | 16.17185                           |
| <i>Anaerotruncus</i>                          | 0.003857                           |
| <i>Faecalibacterium</i>                       | 9.658239                           |
| <i>Oscillospira</i>                           | 1.252751                           |
| <i>Ruminococcus</i>                           | 5.444896                           |
| <i>Dialister</i>                              | 0.687279                           |
| <i>Megamonas</i>                              | 0.05999                            |
| <i>Megasphaera</i>                            | 0.008272                           |
| <i>Phascolarctobacterium</i>                  | 0.726499                           |
| <i>Succiniclacticum</i>                       | 0.042022                           |
| <i>Veillonella</i>                            | 0.112855                           |
| Unknown genus of <i>Mogibacteriaceae</i>      | 0.03281                            |
| Unknown genus of <i>SHA.98</i>                | 0.012444                           |
| Unknown genus of <i>Erysipelotrichaceae</i>   | 0.281512                           |
| <i>Catenibacterium</i>                        | 0.010634                           |
| <i>Clostridium</i>                            | 0.034934                           |
| <i>Holdemania</i>                             | 0.034519                           |
| <i>Eubacterium</i>                            | 0.107802                           |
| <i>cc115</i>                                  | 0.036246                           |
| <i>Fusobacterium</i>                          | 0.006446                           |
| Unknown genus of <i>Victivallaceae</i>        | 0.008652                           |
| Unknown genus of <i>RF32</i>                  | 0.018665                           |
| <i>Sutterella</i>                             | 0.15313                            |
| Unknown genus of <i>Enterobacteriaceae</i>    | 0.104165                           |
| <i>Haemophilus</i>                            | 0.031887                           |
| Unknown genus of <i>RF39</i>                  | 0.22359                            |
| Unknown genus of <i>ML615J.28</i>             | 0.04795                            |
| <i>Akkermansia</i>                            | 0.005378                           |
